# Supplementary material for: Reduced insulin signaling maintains electrical transmission in a neural circuit in aging flies
Source: PLoS Biol. 2017 Sep 13;15(9):e2001655. doi: 10.1371/journal.pbio.2001655 (PMC5597081; doi:10.1371/journal.pbio.2001655)
Supplement: S1 Data — (XLSX) [file pbio.2001655.s009.xlsx]

## Sheet: Fig 1B
						TTM				DLM
			Response latencies			7	26	47		7	26	47	← Day
			(wDah)			1.1016	1.074	1.302		1.6164	1.782	1.8456
						0.9864	0.93	1.1712		1.4256	1.5072	1.7724
						1.0524	1.08	1.068		1.5972	1.5744	1.5372
						1.1124	1.0968	1.008		1.626	1.5384	1.614
						1.0284	1.0632	1.1676		1.5912	1.4496	1.722
						1.0068	1.2348	1.128		1.4556	1.6584	1.7028
						1.0596	1.158	1.2744		1.4916	1.59	1.7988
						0.972	1.1376	1.158		1.566	1.6476	1.6464
						0.792		1.368		1.6335		1.932
						0.9168		1.3476		1.3872		1.7496
						1.08		1.2192		1.2936		1.7724
						0.7416		1.3812		1.2132		1.8984
						0.762				1.2228
						0.786				1.2468
						0.7656				1.2324
						0.822
						0.762

## Sheet: Fig 1C
				TTM latencies
				y = young; o = old
					da-GAL4/+ (y)	da-GAL4/+ (o)	UAS-InRdn/+ (y)	UAS-InRdn/+ (o)	da-GAL4/UAS-InRdn (y)	da-GAL4/UAS-InRdn (o)
					1.0824	1.3704	1.05	0.9888	0.9528	1.0404
					1.0596	1.104	1.0728	1.2204	0.8832	1.0764
					0.9588	1.344	0.9612	1.1796	0.828	0.942
					0.9012	1.164	1.0056	1.2672	0.9012	0.996
					1.0272	1.062	1.086	1.17	0.9816	1.0008
					0.9696	1.248	1.008	1.11	0.96	0.96
					1.008	1.002		1.1448	0.9828	0.8352
					1.0104	0.948			0.96	0.828
					0.8724	0.942			0.9324	0.7968
					0.9036	1.0092			0.9	0.7932
					0.8796	0.8472			0.7872	0.7464
					0.8964	0.858			0.7725	0.81
					0.7776	1.065			0.948	0.8244
					0.7752	1.1985				0.876
						1.0296
						1.0692

## Sheet: Fig 2C
		shakB int. density		da-GAL4/+ (y)	da-GAL4/+ (o)	da-GAL4/UAS-InRdn (y)	da-GAL4/UAS-InRdn (o)
		(normalized to da-GAL4/+ (y))		144.029	41.2926	66.0339	51.6987
		(y = young, o = old)		49.6167	40.3527	77.8021	71.4828
				165.69	25.2731	147.376	124.501
				67.1812	32.9181	65.9998	105.915
				77.1592	51.312	74.6906	72.7686
				96.5656		57.7394
		shakB area (in µm2)		da-GAL4/+ (y)	da-GAL4/+ (o)	da-GAL4/UAS-InRdn (y)	da-GAL4/UAS-InRdn (o)
		(y = young, o = old)		158.1	94.8	113	94.2
				97.3	82.5	121.3	150.1
				135.5	109.3	153.3	139.5
				114.6	76.3	102.9	128.6
				110.3	87.2	124.5	131
				121.6		127.8

## Sheet: Fig 3A
		TTM latencies	Day 7		Day 45
		GS ELAV-GAL4/UAS-InRdn (RU+/-)	RU-	RU+	RU-	RU+
			1.02	1.0296	1.092	1.128
			1.074	1.128	1.23	1.14
			1.062	1.1388	1.212	1.0128
			1.0776	0.9312	1.254	0.9936
			1.074	1.152	1.1256	1.164
			1.0296	1.1856	1.1364	1.0668
			0.9876	0.96	0.9768	1.1064
			0.888	1.1472	1.1868
				0.918
				1.1676

## Sheet: Fig 3B
			TTM latencies	Day 5		Day 35
			GS ELAV-GAL4/UAS-InR (RU+/-)	RU-	RU+	RU-	RU+
				0.8832	1.0032	0.8316	1.5
				0.966	0.948	1.2432	1.4808
				0.9276	0.9276	1.0188	1.0764
				0.7404	1.0068	1.0872	1.3956
				0.918	1.0524	1.0644	1.302
				0.9516	1.086	1.2744	1.3716
				0.99	0.9168		1.5624
				0.966	0.954
				1.0524

## Sheet: Fig 4A
							Response latencies (TTM)	Day 5		Day 55
								A307-GAL4/+	A307-GAL4/UAS-InRdn	A307-GAL4/+	A307-GAL4/UAS-InRdn
								0.864	1.002	1.224	0.9108
								1.068	1.0164	1.0584	0.8604
								0.9	1.1412	1.3272	1.0356
								0.9996	0.9912	1.17	0.9024
								1.098	1.0572	1.2288	0.8568
								1.024	0.8916	1.0728	1.002
								1.068
								0.96
								0.9

## Sheet: Fig 4C
						Integrated densities		A307-GAL4/+	A307-GAL4/UAS-InRdn
						(normalized to A307/+)		58.6611	155.177
								31.1697	137.279
								173.302	255.652
								196.39	201.879
								55.8798
								68.3878
								116.212

## Sheet: Fig 4D
								TTM latencies
										A307-GAL4/+	A307-GAL4/UAS-shakB(N+16)	A307-GAL4/+	A307-GAL4/UAS-shakB(N+16)
										0.9732	0.936	0.8616	0.9228
										1.038	0.8388	1.2492	0.7836
										0.942	1.0248	1.386	1.116
										0.9288	1.0812	1.5	1.17
										0.9708	0.9684	1.38	0.936
										0.948	1.023	0.9216	0.936
										1.024	1.104	0.99
										1.068		1.5876
										0.96		1.008
										0.9		1.356
												1.284
												1.17
												1.277
												1.266

## Sheet: Fig 5C
		Cx43 levels				SF	SF + INS	SF + INS + BMS	Serum	Serum + BMS	SF + PKC Activ	SF + PKC Inhib + INS
					Exp1	157.579	52.04	179.303	66.6306	160.578	116.239	207.268
					Exp2	172.089	89.9757	200.702	105.863	186.923	103.026	176.79
					Exp3	166.009	113.564	171.683	127.506	165.118	28.8571	181.775

## Sheet: Fig 5D
					Cx43 levels			Ins	Ins + NH4Cl	Ins + BAFA
							Exp 1	112.976	201.717	182.153
							Exp 2	101.308	200.969	173.71
							Exp 3	85.7164	235.742	157.859

[truncated: 27 more sheets: Fig 5E, Fig 5F, Fig 5G, Fig 5H, Fig 6B, Fig 6C, Fig 6D, Fig 6E, Fig S1A, Fig S1B, Fig S2B, Fig S3A, Fig S3B, Fig S4A, Fig S4B, Fig S4C, Fig S5A, Fig S5B, Fig S5C, Fig S6B …]
